# Supplementary material
Source: publisher figshare collection journal article supplement (https://acs.figshare.com/ndownloader/files/13819682)
Supplement: Supplementary file 1 [file 13819682]

# **Nanoengineered Electroconductive Collagen-Based Cardiac Patch For Infarcted Myocardium Repair**

**by**

Katsuhiro Hosoyama,<sup>1</sup> Manuel Ahumada,<sup>1,2</sup> Christopher D. McTiernan,<sup>1,2</sup> Darryl R. Davis,<sup>3,4</sup>  
Fabio Variola,<sup>5</sup> Marc Ruel,<sup>1</sup> Wenbin Liang,<sup>4,6</sup> Erik J. Suuronen,<sup>1\*</sup> and Emilio I. Alarcon<sup>1,2\*</sup>

\*Ealarcon@ottawaheart.ca and Esuuronen@ottawaheart.ca

*<sup>1</sup>Division of Cardiac Surgery, University of Ottawa Heart Institute, Ottawa, Canada, K1Y 4W7. <sup>2</sup>Bionanomaterials Chemistry and Engineering Laboratory & Department of Biochemistry, Microbiology, and Immunology, Faculty of Medicine, University of Ottawa, Ottawa, Canada, K1H 8M5. <sup>3</sup>University of Ottawa Heart Institute, Division of Cardiology, Department of Medicine, University of Ottawa, Ottawa, Canada, K1Y 4W7. <sup>4</sup>Department of Cellular and Molecular Medicine, University of Ottawa, Ottawa, Canada, K1H 8M5. <sup>5</sup>Department of Mechanical Engineering, University of Ottawa, Canada, K1N 6N5. <sup>6</sup>Cardiac Electrophysiology Lab, University of Ottawa Heart Institute, Canada, K1Y 4W7.*

**Page S1. This page**

**Page S2. Figure S1**

**Page S3. Figure S2**

**Page S4. Figure S3**

**Page S5. Figure S4**

**Page S6. Figure S5**

**Page S7. Figure S6**

**Page S8. Figure S7**

**Page S9. Figure S8**

**Page S10. Figure S9**

**Page S11. Figure S10**

**Page S12. Figure S11**

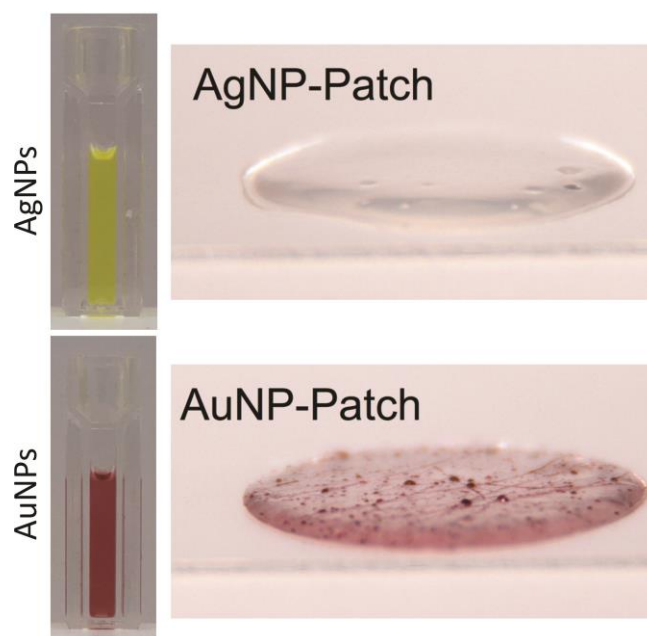

**Figure S1.** Left: Representative macro images of cardiac patches. AgNP- (top) and AuNP-containing (bottom) collagen fibers are aligned onto the elastic hydrogels. Right: Representative macro images of AgNP (top) and AuNP (bottom) solutions. Collagen-capped AgNPs and AuNPs are suspended into trifluoroethanol.

---

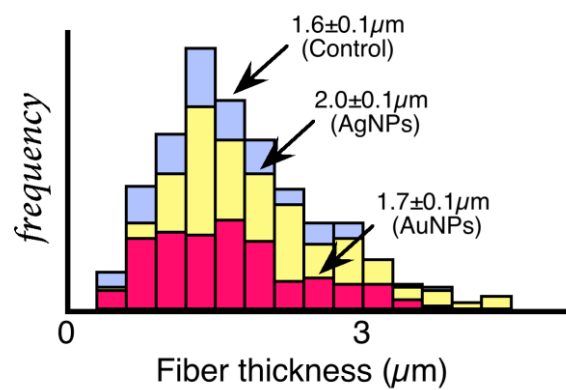

**Figure S2.** Histograms of collagenous fiber thickness with or without AgNPs and AuNPs. Values were calculated from SEM measurements (100 individual fibers).

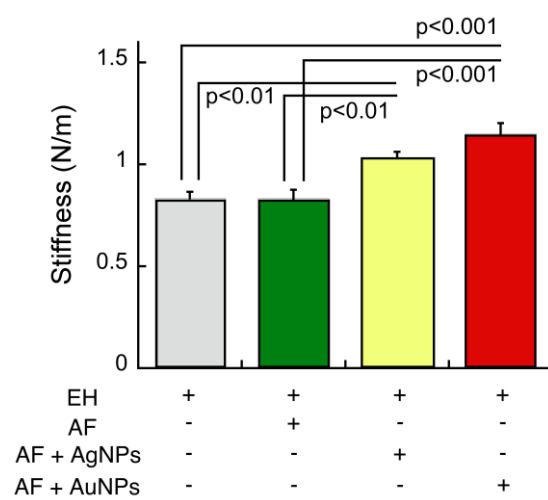

**Figure S3.** Stiffness of cardiac patches assessed by atomic force microscopy (AFM). Error bars correspond to standard errors. P-values were calculated from Tukey-Kramer test (n=10). EH, elastic hydrogel; AF, aligned fiber.

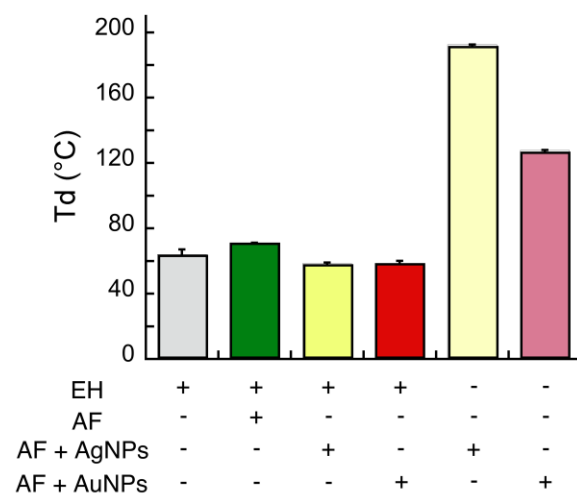

**Figure S4.** Denaturation temperatures for cardiac patches and collagen fibers measured using differential scanning calorimetry (DSC). Error bars correspond to standard errors (n=3). Td, denaturation temperature; EH, elastic hydrogel; AF, aligned fiber.

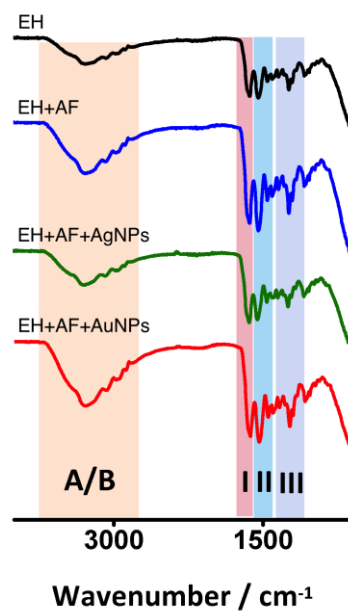

**Figure S5.** Result of Fourier transform infrared (FTIR-ATR) analysis of cardiac patches. Spectra correspond to representative examples for each time of cardiac patch. Highlighted in the plots are shown representative regions for characteristic IR vibrations of collagen.

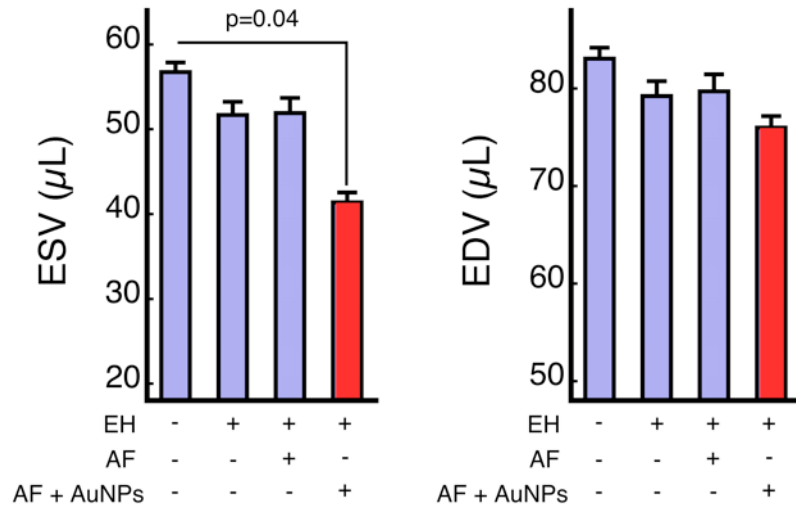

**Figure S6.** End-systolic left ventricular volume (ESV) and end-diastolic left ventricular volume (EDV) in 35 day post-MI animals implanted with the different experimental groups. The sample size was 14 in control, 9 in EH, 11 in EH+AF, and 14 in EH+AF-AuNPs. P-values were calculated from Tukey-Kramer test. EH, elastic hydrogel; AF, aligned fiber.

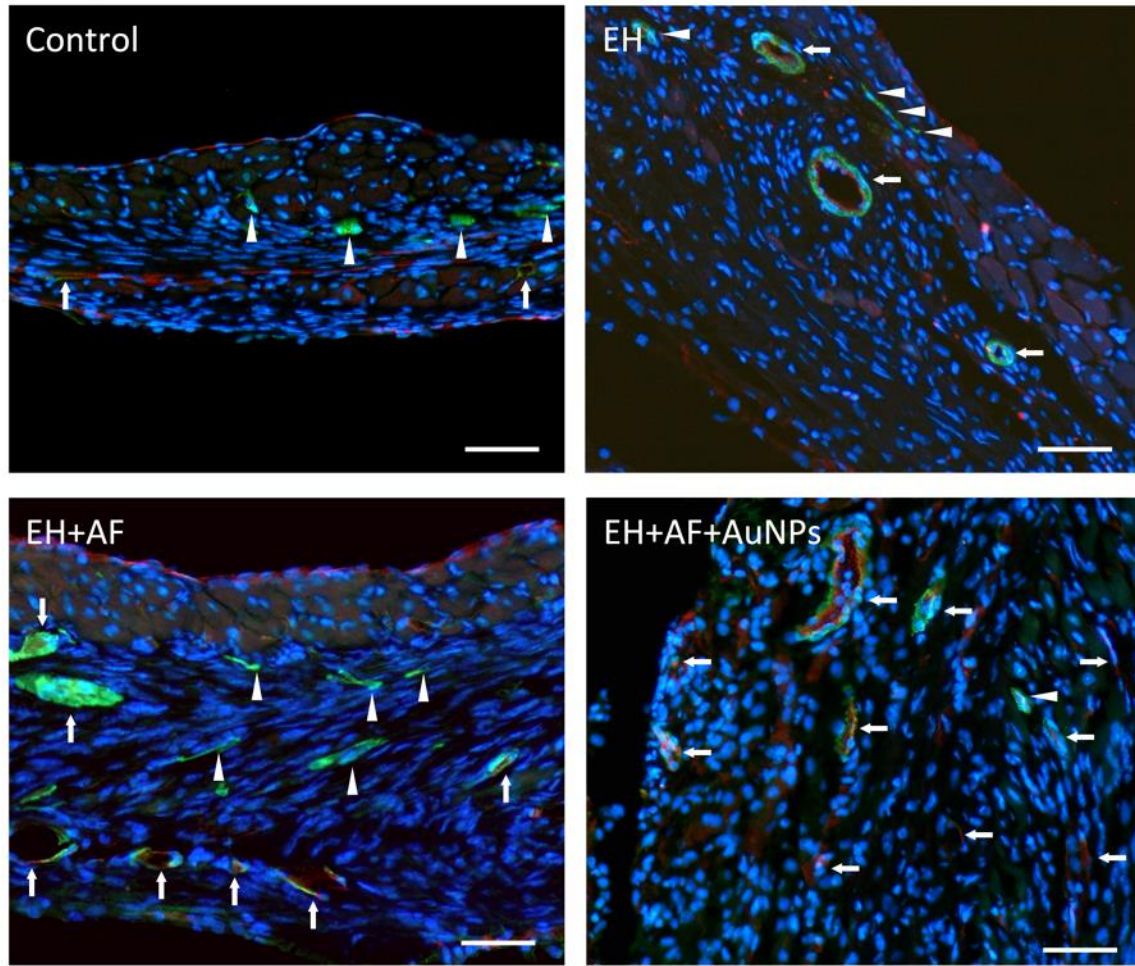

**Figure S7.** Representative images of CD31 (red) and aSMA (green) immunostaining of the murine heart at day 28 post-implantation. Arrows indicate vascular and arrowheads indicate aSMA<sup>+</sup> myoblasts. Scale bar = 50  $\mu$ m. EH, elastic hydrogel; AF, aligned fiber.

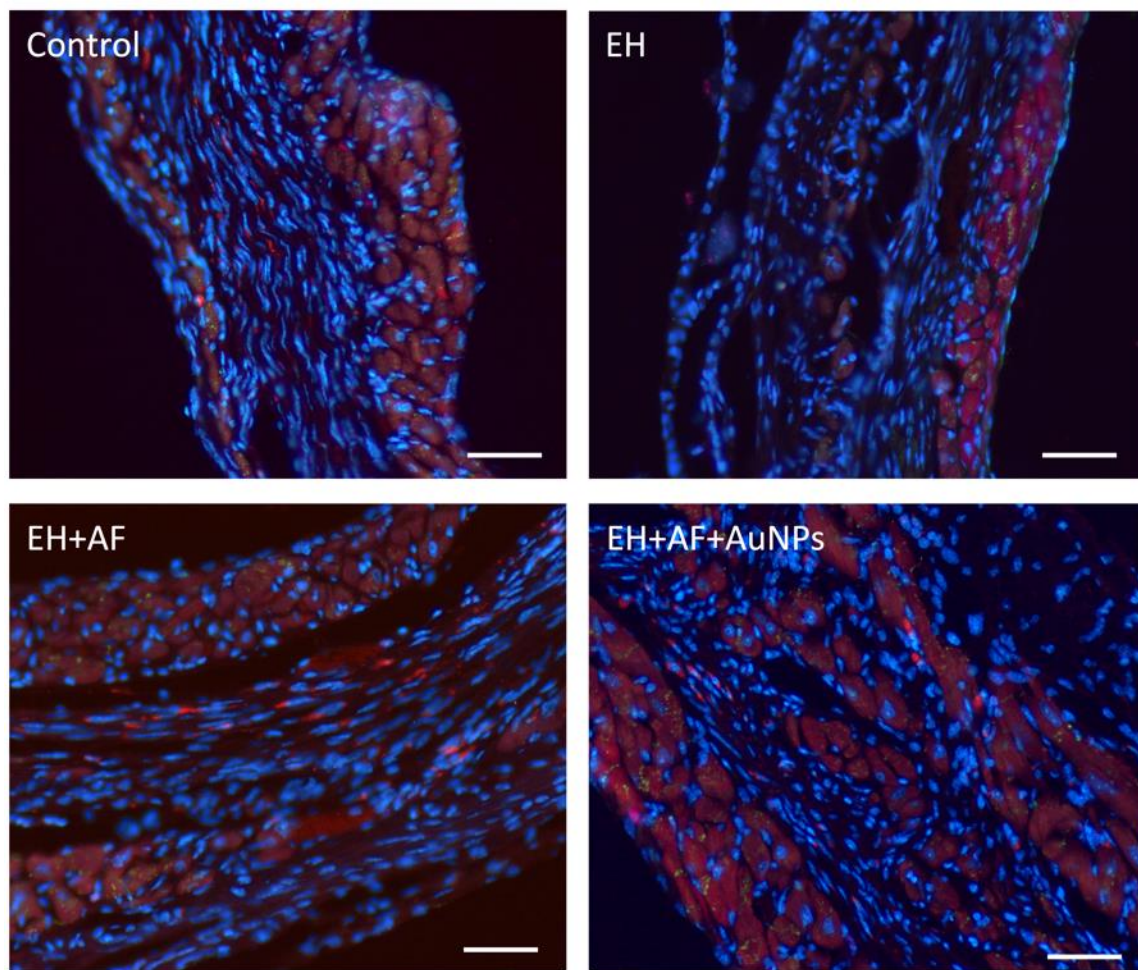

**Figure S8.** Representative images of troponin-I (red) and connexin-43 (green) immunostaining of the murine heart at day 28 post-implantation. Scale bar = 50  $\mu$ m. EH, elastic hydrogel; AF, aligned fiber.

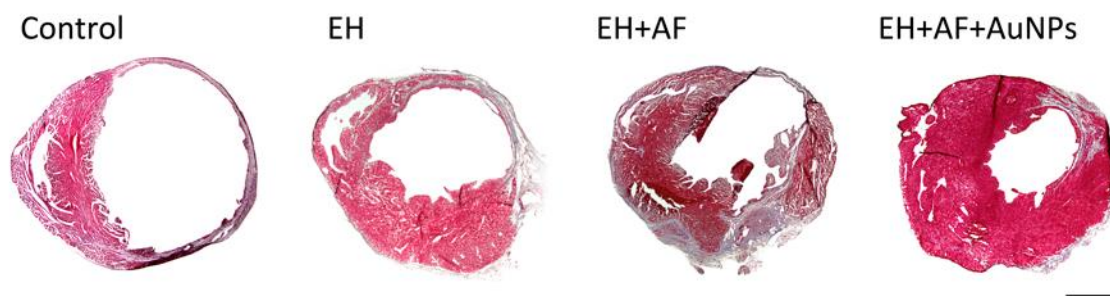

**Figure S9.** Representative images of Masson-Trichrome staining of the murine heart at day 28 post-implantation. Scale bar = 1 mm. EH, elastic hydrogel; AF, aligned fiber.

---

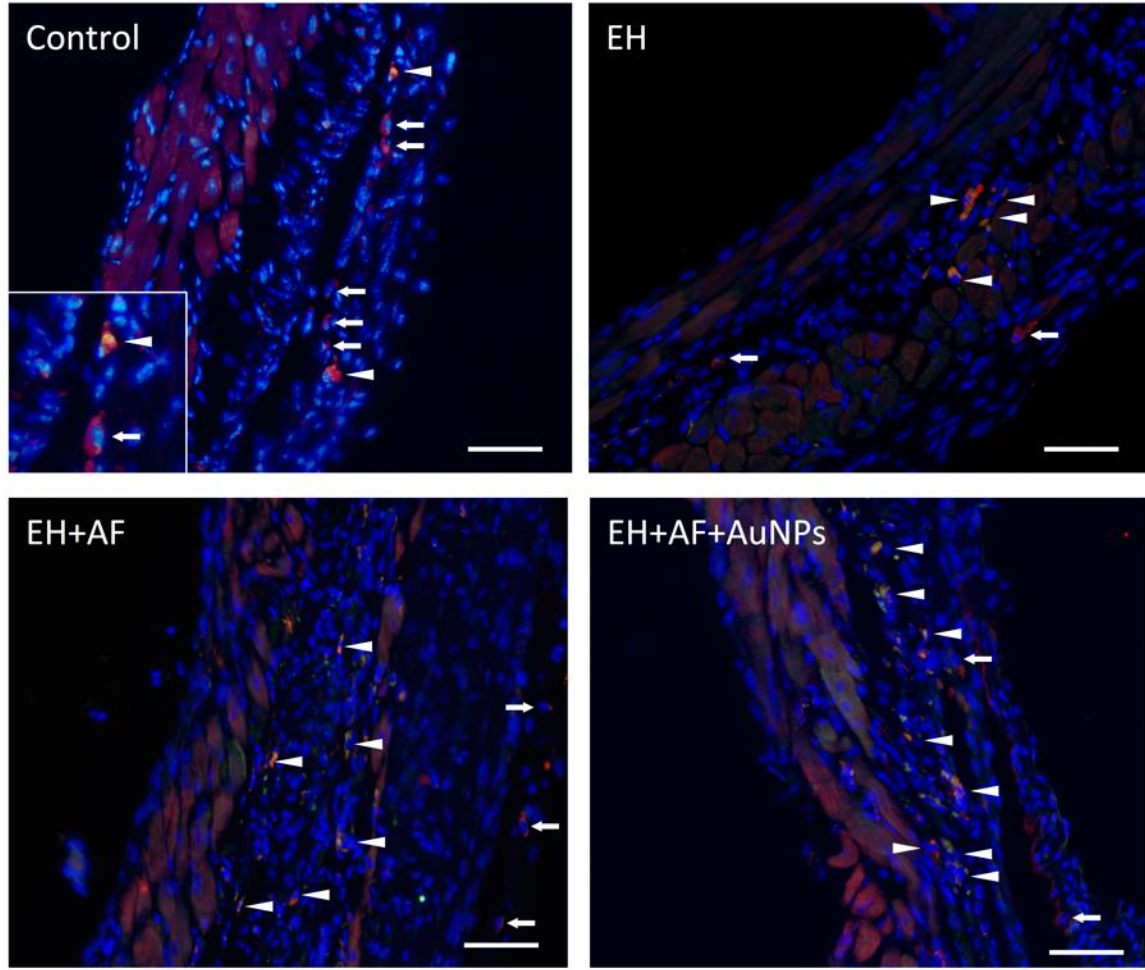

**Figure S10.** Representative images of CD68 (red) and CD206 (green) immunostaining of the murine heart at day 28 post-implantation. Arrows indicate CD68<sup>+</sup>/CD206<sup>-</sup> cells and arrowheads indicate CD68<sup>+</sup>/CD206<sup>+</sup> cells. Scale bar = 50  $\mu$ m. EH, elastic hydrogel; AF, aligned fiber. Scale bar = 50  $\mu$ m. EH, elastic hydrogel; AF, aligned fiber.

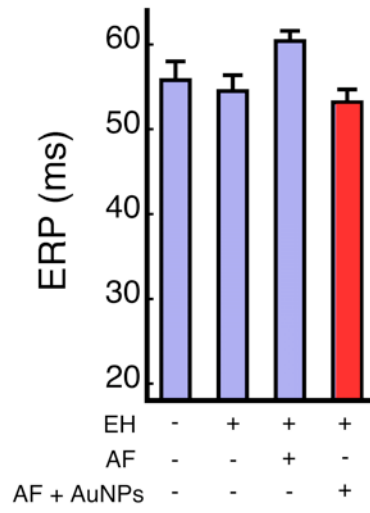

**Figure S11.** Effective refractory period (ERP) measured by electrophysiological study in 35 day post-MI animals implanted with the different experimental groups (n=5). P-values were calculated from Tukey-Kramer test. EH, elastic hydrogel; AF, aligned fiber.
